# Supplementary material for: Assessing intra-lab precision and inter-lab repeatability of outgrowth assays of HIV-1 latent reservoir size
Source: PubMed Central journal article supplement (PMC6481870; doi:10.1371/journal.pcbi.1006849), 2019-04-12
Supplement: pcbi.1006849.s002.pdf [file pcbi.1006849.s002.pdf]

| Assay              | Starting material                                         | Replicates                                                                                  | Dilutions                                   | Stimulation                             | Target cells          | Culture length (days) | Readout | Readout assay          |
|--------------------|-----------------------------------------------------------|---------------------------------------------------------------------------------------------|---------------------------------------------|-----------------------------------------|-----------------------|-----------------------|---------|------------------------|
| UCSD [1, 6, 22]    | 100ml whole blood, $7 - 20 \times 10^6$ rCD4 <sup>+</sup> | 6                                                                                           | 3 fold: $10^6$ to $1,372$ rCD4 <sup>+</sup> | Plate-bound $\alpha$ CD3/ $\alpha$ CD28 | MOLT-4 / CCR5         | 9 - 16                | gag     | RT-PCR                 |
| U. Pitt. [3]       | 180ml whole blood, $300 \times 10^6$ PBMC                 | 6 (5 for smallest cell input)                                                               | 3 fold: $10^6$ to $10^4$ rCD4 <sup>+</sup>  | PHA + $\gamma$ -irradiated PBMC         | CD8 <sup>-</sup> PBMC | 14                    | p24     | Perkin Elmer HIV-1 p24 |
| JHU [2, 3, 11, 13] | $\geq 100$ ml whole blood, $400 \times 10^6$ PBMC         | 2 of cell inputs $< 10^6$ , 13 - 67 of cell input $10^6$ (determined by available material) | 5 fold: $10^6$ to $320$ rCD4 <sup>+</sup>   | PHA + $\gamma$ -irradiated PBMC         | MOLT-4 / CCR5         | 21                    | p24     | Perkin Elmer HIV-1 p24 |
| SR                 | $\geq 100$ ml whole blood, $400 \times 10^6$ PBMC         | 2 of cell inputs $< 10^6$ , 5 - 22 of cell input $10^6$ (determined by available material)  | 5 fold: $10^6$ to $320$ rCD4 <sup>+</sup>   | PHA + $\gamma$ -irradiated PBMC         | CD8 <sup>-</sup> PBMC | 8 - 20                | p24     | Perkin Elmer HIV-1 p24 |
