# Supplementary material for: Assessing intra-lab precision and inter-lab repeatability of outgrowth assays of HIV-1 latent reservoir size
Source: PubMed Central journal article supplement (PMC6481870; doi:10.1371/journal.pcbi.1006849), 2019-04-12
Supplement: pcbi.1006849.s005.pdf [file pcbi.1006849.s005.pdf]

| Parameter  | Scenario                                | Median [2.5, 97.5%ile]<br>bias of estimate ( $\log_{10}$ ) | 95% CI<br>coverage |
|------------|-----------------------------------------|------------------------------------------------------------|--------------------|
| $\sigma_a$ | No excess variation                     | +0.106 [+0.064, +0.244]                                    | N/A                |
|            | Moderate variation (normal-distributed) | +0.038 [-0.017, +0.206]                                    | 98.1%              |
|            | Moderate variation (gamma-distributed)  | +0.037 [-0.017, +0.212]                                    | 97.9%              |
|            | Large variation (normal-distributed)    | +0.014 [-0.194, +0.322]                                    | 97.4%              |
|            | Large variation (gamma-distributed)     | +0.035 [-0.188, +0.406]                                    | 96.0%              |
| $\sigma_b$ | No excess variation                     | +0.132 [+0.084, +0.283]                                    | N/A                |
|            | Moderate variation (normal-distributed) | +0.074 [+0.001, +0.268]                                    | 99.8%              |
|            | Moderate variation (gamma-distributed)  | +0.076 [+0.006, +0.278]                                    | 99.5%              |
|            | Large variation (normal-distributed)    | +0.041 [-0.159, +0.508]                                    | 99.3%              |
|            | Large variation (gamma-distributed)     | +0.056 [-0.152, +0.528]                                    | 99.6%              |
