# Supplementary material for: Assessing intra-lab precision and inter-lab repeatability of outgrowth assays of HIV-1 latent reservoir size
Source: PubMed Central journal article supplement (PMC6481870; doi:10.1371/journal.pcbi.1006849), 2019-04-12
Supplement: pcbi.1006849.s006.pdf [file pcbi.1006849.s006.pdf]

| Parameter                                                          | Median<br>[2.5, 97.5%ile]<br>bias of estimate<br>(log <sub>10</sub> ) | Median absolute<br>error of estimate<br>(log <sub>10</sub> ) | 95% CI<br>coverage |
|--------------------------------------------------------------------|-----------------------------------------------------------------------|--------------------------------------------------------------|--------------------|
| Total variation<br>$(\sqrt{\sigma_a^2 + \sigma_b^2 + \sigma_c^2})$ | +0.014 [-0.095, +0.144]                                               | 0.043                                                        | 95.1%              |
| Aliquot & batch variation<br>$(\sqrt{\sigma_a^2 + \sigma_b^2})$    | -0.018 [-0.256, +0.142]                                               | 0.059                                                        | 97.2%              |
| Aliquot & lab variation<br>$(\sqrt{\sigma_a^2 + \sigma_c^2})$      | +0.063 [-0.043, +0.178]                                               | 0.064                                                        | 77.9%              |
| Batch & lab variation<br>$(\sqrt{\sigma_b^2 + \sigma_c^2})$        | -0.017 [-0.238, +0.143]                                               | 0.065                                                        | 95.6%              |
| $\sigma_a$                                                         | +0.045 [-0.175, +0.168]                                               | 0.083                                                        | 88.3%              |
| $\sigma_b$                                                         | -0.205 [-0.248, +0.109]                                               | 0.205                                                        | 91.8%              |
| $\sigma_c$                                                         | +0.014 [-0.189, +0.194]                                               | 0.115                                                        | 93.5%              |
| $\beta_{\mathbf{S}}$                                               | +0.001 [-0.279, +0.266]                                               | 0.095                                                        | 95.0%              |
| $\beta_2$                                                          | +0.013 [-0.332, +0.367]                                               | 0.126                                                        | 93.8%              |
| $\beta_3$                                                          | +0.001 [-0.393, +0.411]                                               | 0.135                                                        | 94.0%              |
| $\beta_4$                                                          | -0.014 [-0.463, +0.407]                                               | 0.143                                                        | 94.2%              |
