# Supplementary material for: Assessing intra-lab precision and inter-lab repeatability of outgrowth assays of HIV-1 latent reservoir size
Source: PubMed Central journal article supplement (PMC6481870; doi:10.1371/journal.pcbi.1006849), 2019-04-12
Supplement: pcbi.1006849.s007.pdf [file pcbi.1006849.s007.pdf]

| Parameter                                                          | Median<br>[2.5, 97.5%ile]<br>bias of estimate<br>(log <sub>10</sub> ) | Median absolute<br>error of estimate<br>(log <sub>10</sub> ) | 95% CI<br>coverage |
|--------------------------------------------------------------------|-----------------------------------------------------------------------|--------------------------------------------------------------|--------------------|
| Total variation<br>$(\sqrt{\sigma_a^2 + \sigma_b^2 + \sigma_c^2})$ | +0.016 [-0.092, +0.149]                                               | 0.044                                                        | 94.8%              |
| Aliquot & batch variation<br>$(\sqrt{\sigma_a^2 + \sigma_b^2})$    | -0.016 [-0.259, +0.146]                                               | 0.059                                                        | 97.3%              |
| Aliquot & lab variation<br>$(\sqrt{\sigma_a^2 + \sigma_c^2})$      | +0.064 [-0.042, +0.179]                                               | 0.065                                                        | 76.9%              |
| Batch & lab variation<br>$(\sqrt{\sigma_b^2 + \sigma_c^2})$        | -0.015 [-0.234, +0.148]                                               | 0.065                                                        | 95.4%              |
| $\sigma_a$                                                         | +0.044 [-0.175, +0.174]                                               | 0.083                                                        | 88.7%              |
| $\sigma_b$                                                         | -0.203 [-0.248, +0.114]                                               | 0.203                                                        | 92.2%              |
| $\sigma_c$                                                         | +0.014 [-0.189, +0.196]                                               | 0.119                                                        | 93.4%              |
| $\beta_{\mathbf{S}}$                                               | +0.000 [-0.282, +0.268]                                               | 0.095                                                        | 95.3%              |
| $\beta_2$                                                          | +0.013 [-0.330, +0.367]                                               | 0.127                                                        | 93.7%              |
| $\beta_3$                                                          | +0.001 [-0.396, +0.408]                                               | 0.134                                                        | 93.9%              |
| $\beta_4$                                                          | -0.012 [-0.469, +0.415]                                               | 0.142                                                        | 94.3%              |
