# Supplementary material for: Assessing intra-lab precision and inter-lab repeatability of outgrowth assays of HIV-1 latent reservoir size
Source: PubMed Central journal article supplement (PMC6481870; doi:10.1371/journal.pcbi.1006849), 2019-04-12
Supplement: pcbi.1006849.s008.pdf [file pcbi.1006849.s008.pdf]

| Parameter                                                          | Median<br>[2.5, 97.5%ile]<br>bias of estimate<br>(log <sub>10</sub> ) | Median absolute<br>error of estimate<br>(log <sub>10</sub> ) | 95% CI<br>coverage |
|--------------------------------------------------------------------|-----------------------------------------------------------------------|--------------------------------------------------------------|--------------------|
| Total variation<br>$(\sqrt{\sigma_a^2 + \sigma_b^2 + \sigma_c^2})$ | +0.017 [-0.094, +0.149]                                               | 0.044                                                        | 94.7%              |
| Aliquot & batch variation<br>$(\sqrt{\sigma_a^2 + \sigma_b^2})$    | -0.016 [-0.255, +0.145]                                               | 0.060                                                        | 97.3%              |
| Aliquot & lab variation<br>$(\sqrt{\sigma_a^2 + \sigma_c^2})$      | +0.064 [-0.041, +0.181]                                               | 0.066                                                        | 76.4%              |
| Batch & lab variation<br>$(\sqrt{\sigma_b^2 + \sigma_c^2})$        | -0.013 [-0.235, +0.150]                                               | 0.064                                                        | 95.6%              |
| $\sigma_a$                                                         | +0.047 [-0.175, +0.173]                                               | 0.085                                                        | 88.5%              |
| $\sigma_b$                                                         | -0.206 [-0.248, +0.116]                                               | 0.207                                                        | 92.1%              |
| $\sigma_c$                                                         | +0.008 [-0.189, +0.198]                                               | 0.118                                                        | 93.7%              |
| $\beta_{\mathbf{S}}$                                               | +0.000 [-0.281, +0.269]                                               | 0.096                                                        | 95.5%              |
| $\beta_2$                                                          | +0.014 [-0.331, +0.369]                                               | 0.126                                                        | 93.6%              |
| $\beta_3$                                                          | +0.001 [-0.393, +0.411]                                               | 0.135                                                        | 94.1%              |
| $\beta_4$                                                          | -0.014 [-0.464, +0.411]                                               | 0.142                                                        | 94.5%              |
