# Supplementary material for: Assessing intra-lab precision and inter-lab repeatability of outgrowth assays of HIV-1 latent reservoir size
Source: PubMed Central journal article supplement (PMC6481870; doi:10.1371/journal.pcbi.1006849), 2019-04-12
Supplement: pcbi.1006849.s009.pdf [file pcbi.1006849.s009.pdf]

| Condition                            | Probability of misidentifying source of variation (median and 95% CI) |                                      |                                                                  | Performance of total variation estimate<br>( $\sqrt{\sigma_a^2 + \sigma_b^2 + \sigma_c^2}$ ) |                                       |                 |
|--------------------------------------|-----------------------------------------------------------------------|--------------------------------------|------------------------------------------------------------------|----------------------------------------------------------------------------------------------|---------------------------------------|-----------------|
|                                      | Source                                                                | Posterior prob. that parameter $> 0$ | Posterior prob. that parameter $\geq$ median estimate in Table 4 | Median [2.5, 97.5%ile] bias ( $\log_{10}$ )                                                  | Median absolute error ( $\log_{10}$ ) | 95% CI coverage |
| $\sigma_a = 0$                       | $\sigma_a$                                                            | 34.9% (19.4% - 94.5%)                | 2.3% (0.2% - 66.0%)                                              | +0.005 [-0.119, +0.119]                                                                      | 0.034                                 | 95%             |
| $\sigma_b = 0$                       | $\sigma_b$                                                            | 76.3% (35.0% - 99.9%)                | 19.6% (0.6% - 88.7%)                                             | +0.010 [-0.077, +0.150]                                                                      | 0.040                                 | 93%             |
| $\sigma_c = 0$                       | $\sigma_c$                                                            | 63.7% (31.8% - 99.5%)                | 37.0% (3.5% - 98.7%)                                             | +0.002 [-0.104, +0.083]                                                                      | 0.031                                 | 96%             |
| $\sigma_a = \sigma_b = 0$            | $\sigma_a$                                                            | 33.8% (20.0% - 79.5%)                | 0.1% (0.0% - 6.9%)                                               | +0.023 [-0.094, +0.139]                                                                      | 0.054                                 | 91%             |
|                                      | $\sigma_b$                                                            | 99.4% (55.9% - 100.0%)               | 24.7% (0.6% - 83.4%)                                             |                                                                                              |                                       |                 |
| $\sigma_a = \sigma_c = 0$            | $\sigma_a$                                                            | 31.9% (20.6% - 94.7%)                | 1.7% (0.1% - 49.6%)                                              | +0.001 [-0.091, +0.080]                                                                      | 0.026                                 | 96%             |
|                                      | $\sigma_c$                                                            | 99.1% (49.9% - 100.0%)               | 78.2% (5.3% - 99.0%)                                             |                                                                                              |                                       |                 |
| $\sigma_b = \sigma_c = 0$            | $\sigma_b$                                                            | 41.8% (26.8% - 73.6%)                | 0.5% (0.0% - 12.6%)                                              | +0.023 [-0.056, +0.095]                                                                      | 0.032                                 | 92%             |
|                                      | $\sigma_c$                                                            | 41.9% (25.6% - 77.4%)                | 1.7% (0.0% - 28.2%)                                              |                                                                                              |                                       |                 |
| $\sigma_a = \sigma_b = \sigma_c = 0$ | $\sigma_a$                                                            | 32.9% (22.7% - 67.0%)                | 0.0% (0.0% - 2.0%)                                               | +0.044 [+0.015, +0.138]                                                                      | 0.044                                 | 95%             |
|                                      | $\sigma_b$                                                            | 34.0% (23.5% - 78.5%)                | 0.1% (0.0% - 3.0%)                                               |                                                                                              |                                       |                 |
|                                      | $\sigma_c$                                                            | 34.2% (23.1% - 82.5%)                | 0.0% (0.0% - 4.1%)                                               |                                                                                              |                                       |                 |
