# Supplementary material for: Assessing intra-lab precision and inter-lab repeatability of outgrowth assays of HIV-1 latent reservoir size
Source: PubMed Central journal article supplement (PMC6481870; doi:10.1371/journal.pcbi.1006849), 2019-04-12
Supplement: pcbi.1006849.s012.pdf [file pcbi.1006849.s012.pdf]

| Change in $\log_{10}$ error, IUPM = 0.1 | U. Pitt.                          | UCSD                               | JHU                                | SR                                 | JHU (8M)                           | SR (8M)                            |
|-----------------------------------------|-----------------------------------|------------------------------------|------------------------------------|------------------------------------|------------------------------------|------------------------------------|
| U. Pitt.                                |                                   | -0.34<br>(-0.46 to -0.19)          | -0.27<br>(-0.43 to 0.12)           | $+\infty$<br>(-0.32 to $+\infty$ ) | 0.38<br>(-0.37 to $+\infty$ )      | $+\infty$<br>(-0.11 to $+\infty$ ) |
| UCSD                                    | 0.34<br>(0.19 to 0.46)            |                                    | 0.06<br>(-0.04 to 0.40)            | $+\infty$<br>(0.04 to $+\infty$ )  | 0.70<br>(0.00 to $+\infty$ )       | $+\infty$<br>(0.24 to $+\infty$ )  |
| JHU                                     | 0.27<br>(-0.12 to 0.43)           | -0.06<br>(-0.40 to 0.04)           |                                    | $+\infty$<br>(-0.01 to $+\infty$ ) | 0.59<br>(-0.02 to $+\infty$ )      | $+\infty$<br>(0.11 to $+\infty$ )  |
| SR                                      | $-\infty$<br>( $-\infty$ to 0.32) | $-\infty$<br>( $-\infty$ to -0.04) | $-\infty$<br>( $-\infty$ to 0.01)  |                                    | 0.00<br>( $-\infty$ to $+\infty$ ) | 0.00<br>(0.00 to $+\infty$ )       |
| JHU (8M)                                | -0.38<br>( $-\infty$ to 0.37)     | -0.70<br>( $-\infty$ to 0.00)      | -0.59<br>( $-\infty$ to 0.02)      | 0.00<br>( $-\infty$ to $+\infty$ ) |                                    | 0.00<br>(-0.13 to $+\infty$ )      |
| SR (8M)                                 | $-\infty$<br>( $-\infty$ to 0.11) | $-\infty$<br>( $-\infty$ to -0.24) | $-\infty$<br>( $-\infty$ to -0.11) | 0.00<br>( $-\infty$ to 0.00)       | 0.00<br>( $-\infty$ to 0.13)       |                                    |

| Change in $\log_{10}$ error, IUPM = 0.2 | U. Pitt.                          | UCSD                               | JHU                               | SR                                 | JHU (8M)                            | SR (8M)                            |
|-----------------------------------------|-----------------------------------|------------------------------------|-----------------------------------|------------------------------------|-------------------------------------|------------------------------------|
| U. Pitt.                                |                                   | -0.05<br>(-0.09 to 0.00)           | -0.02<br>(-0.08 to 0.11)          | 0.18<br>(-0.06 to $+\infty$ )      | 0.06<br>(-0.08 to $+\infty$ )       | $+\infty$<br>(-0.04 to $+\infty$ ) |
| UCSD                                    | 0.05<br>(0.00 to 0.09)            |                                    | 0.03<br>(-0.03 to 0.14)           | 0.23<br>(-0.02 to $+\infty$ )      | 0.10<br>(-0.03 to $+\infty$ )       | $+\infty$<br>(0.01 to $+\infty$ )  |
| JHU                                     | 0.02<br>(-0.11 to 0.08)           | -0.03<br>(-0.14 to 0.03)           |                                   | 0.19<br>(-0.05 to $+\infty$ )      | 0.09<br>(-0.06 to $+\infty$ )       | $+\infty$<br>(-0.01 to $+\infty$ ) |
| SR                                      | -0.18<br>( $-\infty$ to 0.06)     | -0.23<br>( $-\infty$ to 0.02)      | -0.19<br>( $-\infty$ to 0.05)     |                                    | -0.08<br>( $-\infty$ to $+\infty$ ) | 0.19<br>(-0.10 to $+\infty$ )      |
| JHU (8M)                                | -0.06<br>( $-\infty$ to 0.08)     | -0.10<br>( $-\infty$ to 0.03)      | -0.09<br>( $-\infty$ to 0.06)     | 0.08<br>( $-\infty$ to $+\infty$ ) |                                     | 0.46<br>(-0.15 to $+\infty$ )      |
| SR (8M)                                 | $-\infty$<br>( $-\infty$ to 0.04) | $-\infty$<br>( $-\infty$ to -0.01) | $-\infty$<br>( $-\infty$ to 0.01) | -0.19<br>( $-\infty$ to 0.10)      | -0.46<br>( $-\infty$ to 0.15)       |                                    |
