# Supplementary material for: Assessing intra-lab precision and inter-lab repeatability of outgrowth assays of HIV-1 latent reservoir size
Source: PubMed Central journal article supplement (PMC6481870; doi:10.1371/journal.pcbi.1006849), 2019-04-12
Supplement: pcbi.1006849.s013.pdf [file pcbi.1006849.s013.pdf]

| Change in $\log_{10}$ error, IUPM = 0.5 | U. Pitt.                      | UCSD                          | JHU                           | SR                            | JHU (8M)                      | SR (8M)                       |
|-----------------------------------------|-------------------------------|-------------------------------|-------------------------------|-------------------------------|-------------------------------|-------------------------------|
| U. Pitt.                                |                               | -0.06<br>(-0.09 to 0.00)      | -0.05<br>(-0.10 to 0.02)      | 0.01<br>(-0.08 to 0.34)       | 0.00<br>(-0.08 to 0.15)       | 0.04<br>(-0.09 to $+\infty$ ) |
| UCSD                                    | 0.06<br>(0.00 to 0.09)        |                               | 0.00<br>(-0.03 to 0.06)       | 0.07<br>(-0.02 to 0.39)       | 0.05<br>(-0.02 to 0.19)       | 0.10<br>(-0.02 to $+\infty$ ) |
| JHU                                     | 0.05<br>(-0.02 to 0.10)       | 0.00<br>(-0.06 to 0.03)       |                               | 0.06<br>(-0.03 to 0.40)       | 0.05<br>(-0.03 to 0.19)       | 0.09<br>(-0.03 to $+\infty$ ) |
| SR                                      | -0.01<br>(-0.34 to 0.08)      | -0.07<br>(-0.39 to 0.02)      | -0.06<br>(-0.40 to 0.03)      |                               | -0.02<br>(-0.34 to 0.12)      | 0.04<br>(-0.16 to $+\infty$ ) |
| JHU (8M)                                | 0.00<br>(-0.15 to 0.08)       | -0.05<br>(-0.19 to 0.02)      | -0.05<br>(-0.19 to 0.03)      | 0.02<br>(-0.12 to 0.34)       |                               | 0.05<br>(-0.12 to $+\infty$ ) |
| SR (8M)                                 | -0.04<br>( $-\infty$ to 0.09) | -0.10<br>( $-\infty$ to 0.02) | -0.09<br>( $-\infty$ to 0.03) | -0.04<br>( $-\infty$ to 0.16) | -0.05<br>( $-\infty$ to 0.12) |                               |

| Change in $\log_{10}$ error, IUPM = 1 | U. Pitt.                 | UCSD                     | JHU                      | SR                       | JHU (8M)                 | SR (8M)                 |
|---------------------------------------|--------------------------|--------------------------|--------------------------|--------------------------|--------------------------|-------------------------|
| U. Pitt.                              |                          | -0.02<br>(-0.04 to 0.01) | -0.03<br>(-0.05 to 0.02) | 0.01<br>(-0.04 to 0.13)  | 0.01<br>(-0.03 to 0.10)  | 0.04<br>(-0.04 to 0.18) |
| UCSD                                  | 0.02<br>(-0.01 to 0.04)  |                          | -0.01<br>(-0.03 to 0.03) | 0.03<br>(-0.02 to 0.16)  | 0.03<br>(-0.01 to 0.12)  | 0.06<br>(-0.02 to 0.20) |
| JHU                                   | 0.03<br>(-0.02 to 0.05)  | 0.01<br>(-0.03 to 0.03)  |                          | 0.04<br>(-0.02 to 0.16)  | 0.04<br>(-0.02 to 0.12)  | 0.06<br>(-0.02 to 0.20) |
| SR                                    | -0.01<br>(-0.13 to 0.04) | -0.03<br>(-0.16 to 0.02) | -0.04<br>(-0.16 to 0.02) |                          | 0.00<br>(-0.13 to 0.08)  | 0.02<br>(-0.14 to 0.18) |
| JHU (8M)                              | -0.01<br>(-0.10 to 0.03) | -0.03<br>(-0.12 to 0.01) | -0.04<br>(-0.12 to 0.02) | 0.00<br>(-0.08 to 0.13)  |                          | 0.02<br>(-0.08 to 0.17) |
| SR (8M)                               | -0.04<br>(-0.18 to 0.04) | -0.06<br>(-0.20 to 0.02) | -0.06<br>(-0.20 to 0.02) | -0.02<br>(-0.18 to 0.14) | -0.02<br>(-0.17 to 0.08) |                         |

| Change in $\log_{10}$ error, IUPM = 2 | U. Pitt.                 | UCSD                     | JHU                      | SR                       | JHU (8M)                 | SR (8M)                 |
|---------------------------------------|--------------------------|--------------------------|--------------------------|--------------------------|--------------------------|-------------------------|
| U. Pitt.                              |                          | -0.01<br>(-0.03 to 0.01) | -0.01<br>(-0.04 to 0.04) | 0.01<br>(-0.03 to 0.07)  | 0.02<br>(-0.02 to 0.07)  | 0.03<br>(-0.02 to 0.13) |
| UCSD                                  | 0.01<br>(-0.01 to 0.03)  |                          | -0.01<br>(-0.03 to 0.05) | 0.02<br>(-0.02 to 0.08)  | 0.03<br>(-0.02 to 0.08)  | 0.04<br>(-0.02 to 0.13) |
| JHU                                   | 0.01<br>(-0.04 to 0.04)  | 0.01<br>(-0.05 to 0.03)  |                          | 0.02<br>(-0.04 to 0.08)  | 0.03<br>(-0.03 to 0.08)  | 0.04<br>(-0.03 to 0.14) |
| SR                                    | -0.01<br>(-0.07 to 0.03) | -0.02<br>(-0.08 to 0.02) | -0.02<br>(-0.08 to 0.04) |                          | 0.01<br>(-0.06 to 0.08)  | 0.02<br>(-0.04 to 0.11) |
| JHU (8M)                              | -0.02<br>(-0.07 to 0.02) | -0.03<br>(-0.08 to 0.02) | -0.03<br>(-0.08 to 0.03) | -0.01<br>(-0.08 to 0.06) |                          | 0.01<br>(-0.06 to 0.11) |
| SR (8M)                               | -0.03<br>(-0.13 to 0.02) | -0.04<br>(-0.13 to 0.02) | -0.04<br>(-0.14 to 0.03) | -0.02<br>(-0.11 to 0.04) | -0.01<br>(-0.11 to 0.06) |                         |
