# Supplementary material for: Assessing intra-lab precision and inter-lab repeatability of outgrowth assays of HIV-1 latent reservoir size
Source: PubMed Central journal article supplement (PMC6481870; doi:10.1371/journal.pcbi.1006849), 2019-04-12
Supplement: pcbi.1006849.s014.pdf [file pcbi.1006849.s014.pdf]

| Change in $\log_{10}$ error, IUPM = 0.1 | U. Pitt.                          | UCSD                               | JHU                                | SR                                 | JHU (8M)                           | SR (8M)                            |
|-----------------------------------------|-----------------------------------|------------------------------------|------------------------------------|------------------------------------|------------------------------------|------------------------------------|
| U. Pitt.                                |                                   | -0.36<br>(-0.53 to -0.20)          | -0.37<br>(-0.73 to -0.01)          | $+\infty$<br>(-0.30 to $+\infty$ ) | $+\infty$<br>(-0.55 to $+\infty$ ) | $+\infty$<br>(-0.11 to $+\infty$ ) |
| UCSD                                    | 0.36<br>(0.20 to 0.53)            |                                    | -0.02<br>(-0.23 to 0.28)           | $+\infty$<br>(0.06 to $+\infty$ )  | $+\infty$<br>(-0.11 to $+\infty$ ) | $+\infty$<br>(0.23 to $+\infty$ )  |
| JHU                                     | 0.37<br>(0.01 to 0.73)            | 0.02<br>(-0.28 to 0.23)            |                                    | $+\infty$<br>(0.03 to $+\infty$ )  | 0.60<br>(0.00 to $+\infty$ )       | $+\infty$<br>(0.18 to $+\infty$ )  |
| SR                                      | $-\infty$<br>( $-\infty$ to 0.30) | $-\infty$<br>( $-\infty$ to -0.06) | $-\infty$<br>( $-\infty$ to -0.03) |                                    | 0.00<br>( $-\infty$ to $+\infty$ ) | 0.00<br>(0.00 to $+\infty$ )       |
| JHU (8M)                                | $-\infty$<br>( $-\infty$ to 0.55) | $-\infty$<br>( $-\infty$ to 0.11)  | -0.60<br>( $-\infty$ to 0.00)      | 0.00<br>( $-\infty$ to $+\infty$ ) |                                    | 0.00<br>(-0.08 to $+\infty$ )      |
| SR (8M)                                 | $-\infty$<br>( $-\infty$ to 0.11) | $-\infty$<br>( $-\infty$ to -0.23) | $-\infty$<br>( $-\infty$ to -0.18) | 0.00<br>( $-\infty$ to 0.00)       | 0.00<br>( $-\infty$ to 0.08)       |                                    |

| Change in $\log_{10}$ error, IUPM = 0.2 | U. Pitt.                      | UCSD                           | JHU                            | SR                                 | JHU (8M)                            | SR (8M)                       |
|-----------------------------------------|-------------------------------|--------------------------------|--------------------------------|------------------------------------|-------------------------------------|-------------------------------|
| U. Pitt.                                |                               | -0.04<br>(-0.10 to 0.02)       | -0.09<br>(-0.29 to 0.05)       | 0.22<br>(-0.06 to $+\infty$ )      | -0.01<br>(-0.23 to $+\infty$ )      | 0.85<br>(-0.02 to $+\infty$ ) |
| UCSD                                    | 0.04<br>(-0.02 to 0.10)       |                                | -0.05<br>(-0.23 to 0.09)       | 0.26<br>(-0.02 to $+\infty$ )      | 0.03<br>(-0.16 to $+\infty$ )       | 0.88<br>(0.02 to $+\infty$ )  |
| JHU                                     | 0.09<br>(-0.05 to 0.29)       | 0.05<br>(-0.09 to 0.23)        |                                | 0.33<br>(0.01 to $+\infty$ )       | 0.11<br>(-0.02 to $+\infty$ )       | 1.03<br>(0.05 to $+\infty$ )  |
| SR                                      | -0.22<br>( $-\infty$ to 0.06) | -0.26<br>( $-\infty$ to 0.02)  | -0.33<br>( $-\infty$ to -0.01) |                                    | -0.19<br>( $-\infty$ to $+\infty$ ) | 0.20<br>(-0.07 to $+\infty$ ) |
| JHU (8M)                                | 0.01<br>( $-\infty$ to 0.23)  | -0.03<br>( $-\infty$ to 0.16)  | -0.11<br>( $-\infty$ to 0.02)  | 0.19<br>( $-\infty$ to $+\infty$ ) |                                     | 0.55<br>(-0.11 to $+\infty$ ) |
| SR (8M)                                 | -0.85<br>( $-\infty$ to 0.02) | -0.88<br>( $-\infty$ to -0.02) | -1.03<br>( $-\infty$ to -0.05) | -0.20<br>( $-\infty$ to 0.07)      | -0.55<br>( $-\infty$ to 0.11)       |                               |
