# Supplementary material for: Assessing intra-lab precision and inter-lab repeatability of outgrowth assays of HIV-1 latent reservoir size
Source: PubMed Central journal article supplement (PMC6481870; doi:10.1371/journal.pcbi.1006849), 2019-04-12
Supplement: pcbi.1006849.s015.pdf [file pcbi.1006849.s015.pdf]

| Change in $\log_{10}$ error, IUPM = 0.5 | U. Pitt.                      | UCSD                          | JHU                            | SR                            | JHU (8M)                      | SR (8M)                       |
|-----------------------------------------|-------------------------------|-------------------------------|--------------------------------|-------------------------------|-------------------------------|-------------------------------|
| U. Pitt.                                |                               | -0.04<br>(-0.10 to 0.02)      | -0.13<br>(-0.29 to -0.04)      | 0.02<br>(-0.08 to 0.41)       | -0.06<br>(-0.23 to 0.08)      | 0.06<br>(-0.09 to $+\infty$ ) |
| UCSD                                    | 0.04<br>(-0.02 to 0.10)       |                               | -0.08<br>(-0.24 to 0.02)       | 0.07<br>(-0.03 to 0.42)       | -0.02<br>(-0.20 to 0.14)      | 0.10<br>(-0.03 to $+\infty$ ) |
| JHU                                     | 0.13<br>(0.04 to 0.29)        | 0.08<br>(-0.02 to 0.24)       |                                | 0.15<br>(0.03 to 0.61)        | 0.06<br>(-0.02 to 0.19)       | 0.19<br>(0.02 to $+\infty$ )  |
| SR                                      | -0.02<br>(-0.41 to 0.08)      | -0.07<br>(-0.42 to 0.03)      | -0.15<br>(-0.61 to -0.03)      |                               | -0.09<br>(-0.54 to 0.08)      | 0.05<br>(-0.15 to $+\infty$ ) |
| JHU (8M)                                | 0.06<br>(-0.08 to 0.23)       | 0.02<br>(-0.14 to 0.20)       | -0.06<br>(-0.19 to 0.02)       | 0.09<br>(-0.08 to 0.54)       |                               | 0.12<br>(-0.09 to $+\infty$ ) |
| SR (8M)                                 | -0.06<br>( $-\infty$ to 0.09) | -0.10<br>( $-\infty$ to 0.03) | -0.19<br>( $-\infty$ to -0.02) | -0.05<br>( $-\infty$ to 0.15) | -0.12<br>( $-\infty$ to 0.09) |                               |

| Change in $\log_{10}$ error, IUPM = 1 | U. Pitt.                 | UCSD                     | JHU                       | SR                       | JHU (8M)                 | SR (8M)                 |
|---------------------------------------|--------------------------|--------------------------|---------------------------|--------------------------|--------------------------|-------------------------|
| U. Pitt.                              |                          | -0.02<br>(-0.05 to 0.01) | -0.11<br>(-0.27 to -0.02) | 0.02<br>(-0.05 to 0.13)  | -0.06<br>(-0.23 to 0.05) | 0.04<br>(-0.05 to 0.22) |
| UCSD                                  | 0.02<br>(-0.01 to 0.05)  |                          | -0.09<br>(-0.26 to 0.00)  | 0.03<br>(-0.03 to 0.14)  | -0.05<br>(-0.22 to 0.07) | 0.05<br>(-0.03 to 0.24) |
| JHU                                   | 0.11<br>(0.02 to 0.27)   | 0.09<br>(0.00 to 0.26)   |                           | 0.13<br>(0.03 to 0.32)   | 0.05<br>(-0.01 to 0.12)  | 0.15<br>(0.03 to 0.41)  |
| SR                                    | -0.02<br>(-0.13 to 0.05) | -0.03<br>(-0.14 to 0.03) | -0.13<br>(-0.32 to -0.03) |                          | -0.08<br>(-0.28 to 0.04) | 0.02<br>(-0.12 to 0.20) |
| JHU (8M)                              | 0.06<br>(-0.05 to 0.23)  | 0.05<br>(-0.07 to 0.22)  | -0.05<br>(-0.12 to 0.01)  | 0.08<br>(-0.04 to 0.28)  |                          | 0.10<br>(-0.03 to 0.36) |
| SR (8M)                               | -0.04<br>(-0.22 to 0.05) | -0.05<br>(-0.24 to 0.03) | -0.15<br>(-0.41 to -0.03) | -0.02<br>(-0.20 to 0.12) | -0.10<br>(-0.36 to 0.03) |                         |

| Change in $\log_{10}$ error, IUPM = 2 | U. Pitt.                 | UCSD                     | JHU                       | SR                       | JHU (8M)                 | SR (8M)                 |
|---------------------------------------|--------------------------|--------------------------|---------------------------|--------------------------|--------------------------|-------------------------|
| U. Pitt.                              |                          | -0.01<br>(-0.03 to 0.02) | -0.10<br>(-0.26 to -0.01) | 0.01<br>(-0.03 to 0.08)  | -0.06<br>(-0.23 to 0.03) | 0.03<br>(-0.02 to 0.12) |
| UCSD                                  | 0.01<br>(-0.02 to 0.03)  |                          | -0.09<br>(-0.26 to -0.01) | 0.02<br>(-0.03 to 0.09)  | -0.05<br>(-0.22 to 0.04) | 0.03<br>(-0.02 to 0.12) |
| JHU                                   | 0.10<br>(0.01 to 0.26)   | 0.09<br>(0.01 to 0.26)   |                           | 0.12<br>(0.01 to 0.30)   | 0.04<br>(-0.01 to 0.09)  | 0.13<br>(0.03 to 0.32)  |
| SR                                    | -0.01<br>(-0.08 to 0.03) | -0.02<br>(-0.09 to 0.03) | -0.12<br>(-0.30 to -0.01) |                          | -0.07<br>(-0.26 to 0.03) | 0.01<br>(-0.05 to 0.10) |
| JHU (8M)                              | 0.06<br>(-0.03 to 0.23)  | 0.05<br>(-0.04 to 0.22)  | -0.04<br>(-0.09 to 0.01)  | 0.07<br>(-0.03 to 0.26)  |                          | 0.09<br>(-0.02 to 0.28) |
| SR (8M)                               | -0.03<br>(-0.12 to 0.02) | -0.03<br>(-0.12 to 0.02) | -0.13<br>(-0.32 to -0.03) | -0.01<br>(-0.10 to 0.05) | -0.09<br>(-0.28 to 0.02) |                         |
