# Supplementary material for: Assessing intra-lab precision and inter-lab repeatability of outgrowth assays of HIV-1 latent reservoir size
Source: PubMed Central journal article supplement (PMC6481870; doi:10.1371/journal.pcbi.1006849), 2019-04-12
Supplement: pcbi.1006849.s016.pdf [file pcbi.1006849.s016.pdf]

|                                                                | JHU protocol                             |         |                                                     |         |
|----------------------------------------------------------------|------------------------------------------|---------|-----------------------------------------------------|---------|
|                                                                | Weaker therapy (3x),<br>$N = 12$ per arm |         | Stronger therapy (10x),<br>$N = 6$ , no control arm |         |
|                                                                | Unbatched                                | Batched | Unbatched                                           | Batched |
| Median estimated fold-reduction                                | 3.13                                     | 3.06    | 10.67                                               | 9.91    |
| Median bias                                                    | +4%                                      | +2%     | +7%                                                 | -1%     |
| Median $\log_{10}$ absolute error                              | 0.10                                     | 0.08    | 0.23                                                | 0.21    |
| Accuracy improvement from batching (% reduction in abs. error) | 20%                                      |         | 9%                                                  |         |
| Coverage of 95% CI                                             | 88.4%                                    | 87.2%   | 91.0%                                               | 90.4%   |
| Power ( $p < 0.05$ )                                           | 90.5%                                    | 98.6%   | 77.5%                                               | 79.2%   |
| Power improvement from batching (percentage point increase)    | 8%                                       |         | 2%                                                  |         |

|                                                                | UCSD protocol                            |         |                                                     |         |
|----------------------------------------------------------------|------------------------------------------|---------|-----------------------------------------------------|---------|
|                                                                | Weaker therapy (3x),<br>$N = 12$ per arm |         | Stronger therapy (10x),<br>$N = 6$ , no control arm |         |
|                                                                | Unbatched                                | Batched | Unbatched                                           | Batched |
| Median estimated fold-reduction                                | 3.12                                     | 3.03    | 10.52                                               | 9.71    |
| Median bias                                                    | +4%                                      | +1%     | +5%                                                 | -3%     |
| Median $\log_{10}$ absolute error                              | 0.11                                     | 0.08    | 0.21                                                | 0.18    |
| Accuracy improvement from batching (% reduction in abs. error) | 27%                                      |         | 14%                                                 |         |
| Coverage of 95% CI                                             | 88.4%                                    | 87.3%   | 90.7%                                               | 89.3%   |
| Power ( $p < 0.05$ )                                           | 90.5%                                    | 99.4%   | 83.2%                                               | 90.9%   |
| Power improvement from batching (percentage point increase)    | 9%                                       |         | 8%                                                  |         |
